# Supplementary material
Source: PubMed Central journal article supplement (PMC4249010)
Supplement: AEM.02235-14_zam022145787so1.pdf [file AEM.02235-14_zam022145787so1.pdf]

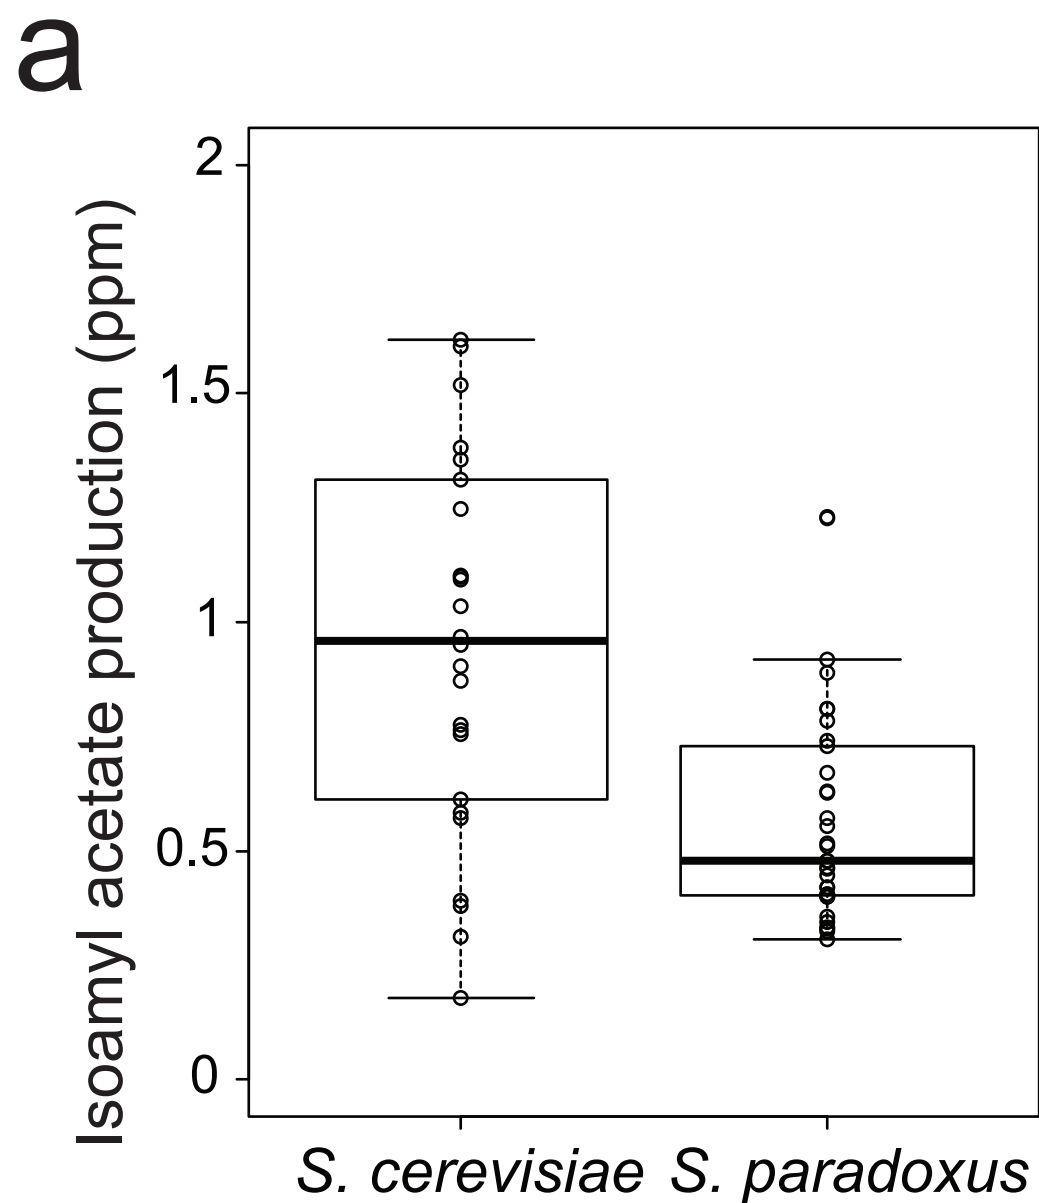

| Average**           |       |
|---------------------|-------|
| 1.010               | 0.570 |
| Trait variability** |       |
| 0.546               | 0.422 |

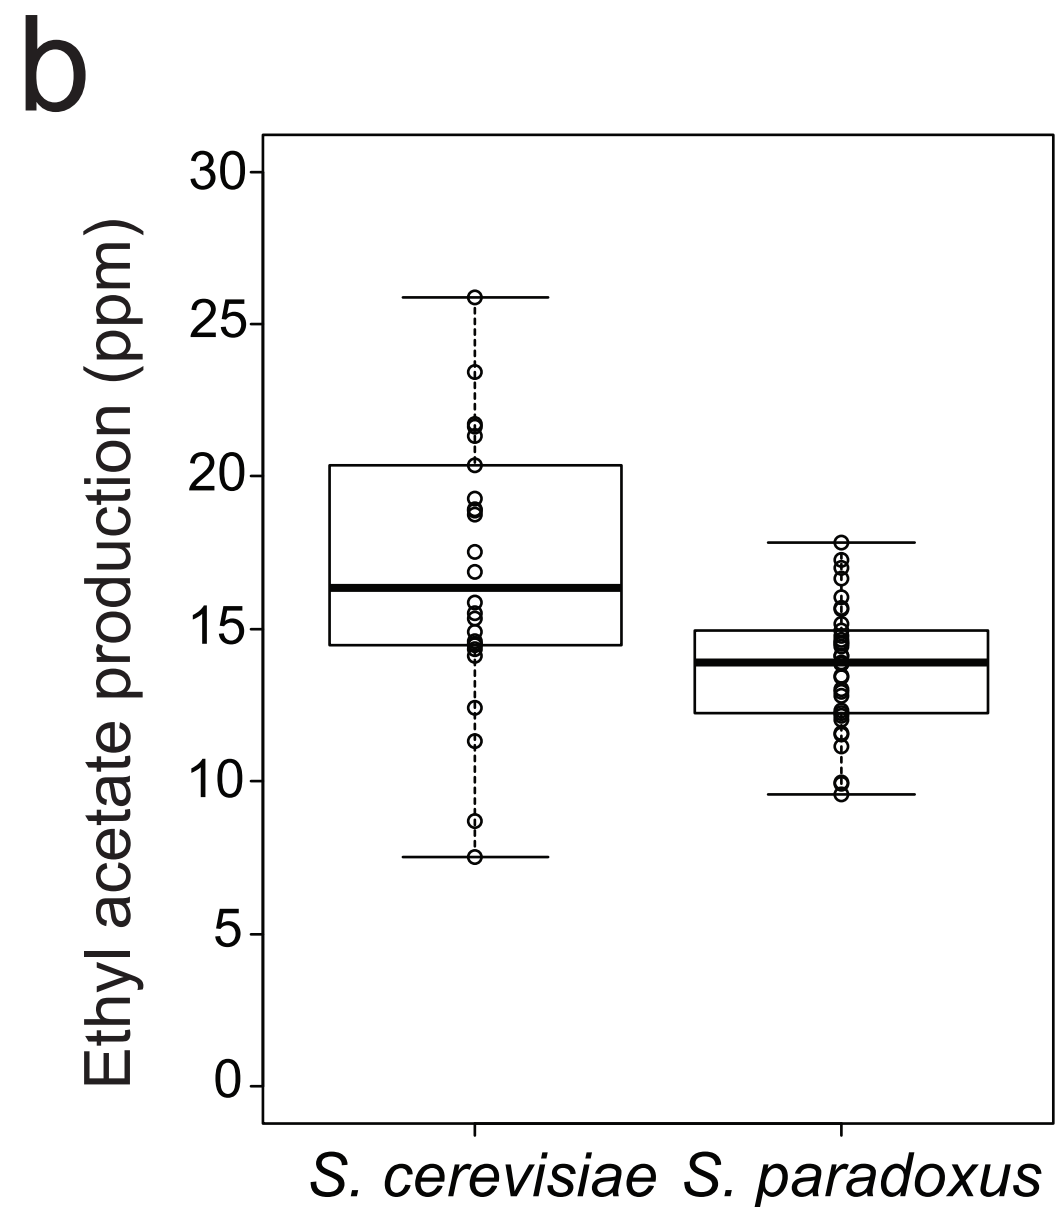

| Average**           |        |
|---------------------|--------|
| 17.838              | 13.747 |
| Trait variability** |        |
| 0.398               | 0.151  |

FIG. S1. Comparison of (a) isoamy acetate and (b) ethyl acetate production in *Saccharomyces cerevisiae* and *Saccharomyces paradoxus*. The coefficient of variation was calculated as a measure of the trait variability. The asterisks determine the level of significance (\* if  $p < 0.05$ , \*\* if  $p < 0.01$ ).

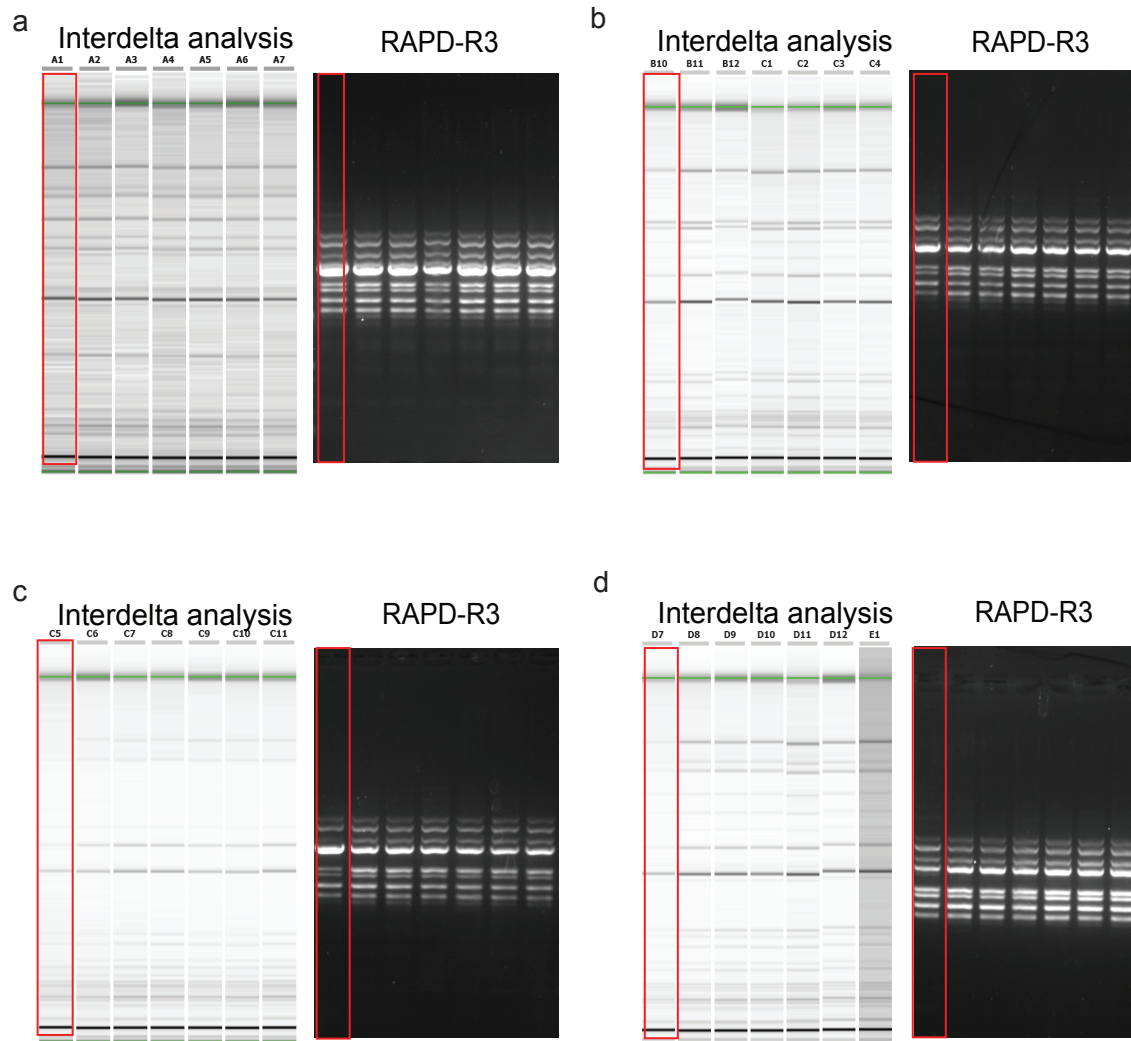

FIG. S2. Stability check of the developed hybrids. Two fingerprints were performed right before and after 6 consecutive wort fermentations: interdelta analysis and RAPD-R3 (see materials and methods for details). No differences in the fingerprint profile of the initial hybrid (lane 1; red rectangle) and hybrids after the stabilization protocol (lanes 2-7) could be detected, nor was any heterogeneity in the stabilized population detected. This indicates that the newly developed hybrids are stable, and that during the stabilization phase, no huge genetic rearrangements took place. A=H20, B=H46, C=H12, D=H41.

TABLE S2. Overview of the developed hybrids. Parental strains are indicated with their Y code, while different segregants of the same parent were given a S code.

|            | Parent 1  |   | Parent 2  | Measured ploidy | Fermentation efficiency (a.u.) | IA (ppm) | EA (ppm) |
|------------|-----------|---|-----------|-----------------|--------------------------------|----------|----------|
| <b>H1</b>  | Y141 (S8) | X | Y141 (S2) | 2               | 1.03                           | 1.440    | 11.814   |
| <b>H2</b>  | Y141 (S6) | X | Y141 (S7) | 2               | 1.00                           | 1.136    | 10.639   |
| <b>H3</b>  | Y141 (S8) | X | Y141 (S7) | 1               | 0.97                           | 1.684    | 14.284   |
| <b>H4</b>  | Y141 (S3) | X | Y141 (S4) | 2               | 0.98                           | 0.921    | 9.960    |
| <b>H5</b>  | Y141 (S8) | X | Y141 (S1) | 2               | 1.04                           | 1.295    | 11.652   |
| <b>H6</b>  | H1 (S6)   | X | H1 (S1)   | 2               | 1.00                           | 1.296    | 12.101   |
| <b>H7</b>  | H1 (S2)   | X | Y141 (S2) | 2               | 0.97                           | 1.517    | 12.422   |
| <b>H8</b>  | H1 (S1)   | X | Y141 (S2) | 2               | 1.02                           | 1.359    | 11.962   |
| <b>H9</b>  | H1 (S3)   | X | H1 (S4)   | 1-2             | 1.01                           | 1.486    | 12.786   |
| <b>H10</b> | H1 (S4)   | X | Y141 (S2) | 1-2             | 0.99                           | 0.452    | 5.741    |
| <b>H11</b> | Y354 (S1) | X | Y354 (S4) | 2               | 1.06                           | 1.802    | 11.248   |
| <b>H12</b> | Y354 (S6) | X | Y354 (S2) | 2               | 1.17                           | 1.967    | 14.503   |
| <b>H13</b> | Y141 (S6) | X | Y354 (S2) | 2               | 0.95                           | 1.035    | 10.665   |
| <b>H14</b> | Y141 (S5) | X | Y354 (S2) | 2               | 0.98                           | 0.982    | 10.901   |
| <b>H15</b> | Y141 (S6) | X | Y354 (S3) | 2               | 0.96                           | 1.064    | 10.547   |
| <b>H16</b> | Y141 (S5) | X | Y354 (S3) | 2               | 0.97                           | 0.901    | 11.118   |
| <b>H17</b> | Y141 (S8) | X | Y354 (S3) | 2               | 0.94                           | 1.163    | 11.084   |
| <b>H18</b> | Y141 (S8) | X | Y354 (S4) | 2               | 0.94                           | 1.136    | 10.496   |
| <b>H19</b> | Y141 (S1) | X | Y354 (S1) | 2               | 0.92                           | 0.937    | 11.161   |
| <b>H20</b> | Y141 (S4) | X | Y354 (S1) | 2               | 0.96                           | 1.063    | 10.324   |
| <b>H21</b> | Y141 (S7) | X | Y354 (S1) | 2               | 0.96                           | 0.966    | 11.146   |
| <b>H22</b> | Y141 (S7) | X | Y354 (S6) | 2               | 0.96                           | 1.338    | 12.926   |
| <b>H23</b> | Y141 (S5) | X | Y354 (S4) | 2               | 0.94                           | 1.523    | 13.068   |
| <b>H24</b> | Y141 (S9) | X | Y354 (S2) | 2               | 0.92                           | 0.878    | 9.492    |
| <b>H25</b> | H1 (S6)   | X | Y354 (S6) | 1-2             | 0.98                           | 1.656    | 13.396   |

|            |           |   |           |     |      |        |        |
|------------|-----------|---|-----------|-----|------|--------|--------|
| <b>H26</b> | H17 (S1)  | X | H1 (S4)   | 2   | 0.93 | 1.578  | 11.669 |
| <b>H27</b> | H1 (S5)   | X | Y354 (S6) | 1-2 | 0.98 | 1.353  | 12.370 |
| <b>H28</b> | H1 (S3)   | X | Y354 (S6) | 2   | 0.94 | 1.288  | 10.237 |
| <b>H29</b> | H17 (S2)  | X | H1 (S4)   | 2   | 0.90 | 1.953  | 13.477 |
| <b>H30</b> | Y141 (S7) | X | Y354 (S5) | 1-2 | 0.97 | 1.041  | 11.619 |
| <b>H31</b> | Y141 (S8) | X | Y397 (S2) | 2   | 0.90 | 2.134  | 15.821 |
| <b>H32</b> | Y397 (S1) | X | Y141 (S5) | 2   | 0.95 | 1.216  | 11.484 |
| <b>H33</b> | H1 (S1)   | X | Y397 (S1) | 2   | 1.05 | 1.643  | 15.964 |
| <b>H34</b> | H1 (S4)   | X | Y397 (S1) | 2   | 1.05 | 1.328  | 12.886 |
| <b>H35</b> | H1 (S2)   | X | Y397 (S1) | 2   | 1.06 | 1.556  | 16.727 |
| <b>H36</b> | H1 (S2)   | X | Y397 (S2) | 2   | 0.97 | 2.028  | 15.543 |
| <b>H37</b> | H1 (S4)   | X | Y397 (S2) | 2   | 1.00 | 2.030  | 14.377 |
| <b>H38</b> | H1 (S1)   | X | Y397 (S2) | 2   | 1.01 | 2.278  | 16.641 |
| <b>H39</b> | Y141 (S6) | X | Y397 (S1) | 3   | 0.98 | 0.822  | 8.458  |
| <b>H40</b> | Y141 (S8) | X | Y397 (S1) | 2   | 1.04 | 1.334  | 14.732 |
| <b>H41</b> | Y354 (S1) | X | Y397 (S2) | 2   | 0.97 | 12.274 | 2.000  |
| <b>H42</b> | Y354 (S5) | X | Y397 (S1) | 3   | 0.96 | 14.690 | 2.516  |
| <b>H43</b> | Y354 (S5) | X | Y397 (S2) | 2   | 0.91 | 17.387 | 2.746  |
| <b>H44</b> | Y354 (S6) | X | Y397 (S2) | 2   | 0.95 | 16.545 | 2.654  |
| <b>H45</b> | Y354 (S1) | X | Y397 (S1) | 3   | 0.98 | 16.082 | 2.158  |
| <b>H46</b> | Y354 (S6) | X | Y397 (S1) | 2   | 0.93 | 16.195 | 2.389  |
